# Supplementary material for: Contribution of SARS-CoV-2 infection preceding COVID-19 mRNA vaccination to generation of cellular and humoral immune responses in children
Source: PubMed Central journal article supplement (PMC10773747; doi:10.3389/fimmu.2023.1327875), 2023-12-20
Supplement: DataSheet_1.pdf [file DataSheet_1.pdf]

## Supplementary tables and figures

**Table S1.** Classification of participants included in cellular assays

|                                   | Classified as <i>not infected</i> pre-vaccination |   |   |   |   |   |   |   |   |    |    |    |    |
|-----------------------------------|---------------------------------------------------|---|---|---|---|---|---|---|---|----|----|----|----|
| Child #                           | 1                                                 | 2 | 3 | 4 | 5 | 6 | 7 | 8 | 9 | 10 | 11 | 12 | 13 |
| Confirmed SARS-CoV2               |                                                   |   |   |   |   |   |   |   |   |    |    |    |    |
| Anti-S antibodies                 |                                                   |   |   |   |   |   |   |   |   |    |    |    |    |
| Anti-NP antibodies                |                                                   |   |   |   |   |   |   |   |   |    |    |    |    |
| NP+S specific IFN- $\gamma$ spots | 1                                                 | 0 | 5 | 0 | 0 | 0 | 0 | 5 | 0 | 7  | 3  | 2  | ?  |

Legend:

|   |         |
|---|---------|
|   | No      |
|   | Yes     |
| ? | Unknown |

|                                   | Classified as <i>infected</i> pre-vaccination |    |    |    |    |    |    |    |    |    |    |    |    |    |
|-----------------------------------|-----------------------------------------------|----|----|----|----|----|----|----|----|----|----|----|----|----|
| Child #                           | 14                                            | 15 | 16 | 17 | 18 | 19 | 20 | 21 | 22 | 23 | 24 | 25 | 26 | 27 |
| Confirmed SARS-CoV2               |                                               |    |    |    |    |    |    |    |    |    |    |    |    |    |
| Anti-S antibodies                 |                                               |    |    |    |    |    | ?  |    |    |    |    |    |    |    |
| Anti-NP antibodies                |                                               |    |    |    |    |    | ?  |    |    |    |    |    |    |    |
| NP+S specific IFN- $\gamma$ spots | 23                                            | 55 | ?  | ?  | ?  | 9  | ?  | 23 | 12 | 13 | ?  | 39 | 9  | 11 |

**Table S2.** Characteristics of the study subpopulation selected for B cell assays

|                           | All children | Infected before vaccination | Not infected before vaccination |
|---------------------------|--------------|-----------------------------|---------------------------------|
| N                         | 14           | 7                           | 7                               |
| Age (mean(sd))            | 12 (3)       | 12 (3)                      | 13 (4)                          |
| Sex (N female (% female)) | 8 (57)       | 4 (57)                      | 4 (57)                          |
| 1 vacdne / 2 vacdne (N)   | 3 // 11      | 3 // 4                      | 0 // 7                          |

**Table S3.** Characteristics of the study subpopulation selected for T cell assays

|                           | Infected before vaccination |                  | Not Infected before vaccination |                  |
|---------------------------|-----------------------------|------------------|---------------------------------|------------------|
|                           | pre-vaccination             | post-vaccination | pre-vaccination                 | post-vaccination |
| N                         | 11                          | 14               | 12                              | 13               |
| Medlan Age (sd)           | 12 (1) years                | 11 (3) years     | 13 (3) years                    | 13 (3) years     |
| Sex (N female (% female)) | 5 (45)                      | 8 (57)           | 4 (33)                          | 5 (38)           |
| 1 vacdne / 2 vacdnes (N)  | 5 / 6                       | 6 / 8            | 0 / 12                          | 0 / 13           |

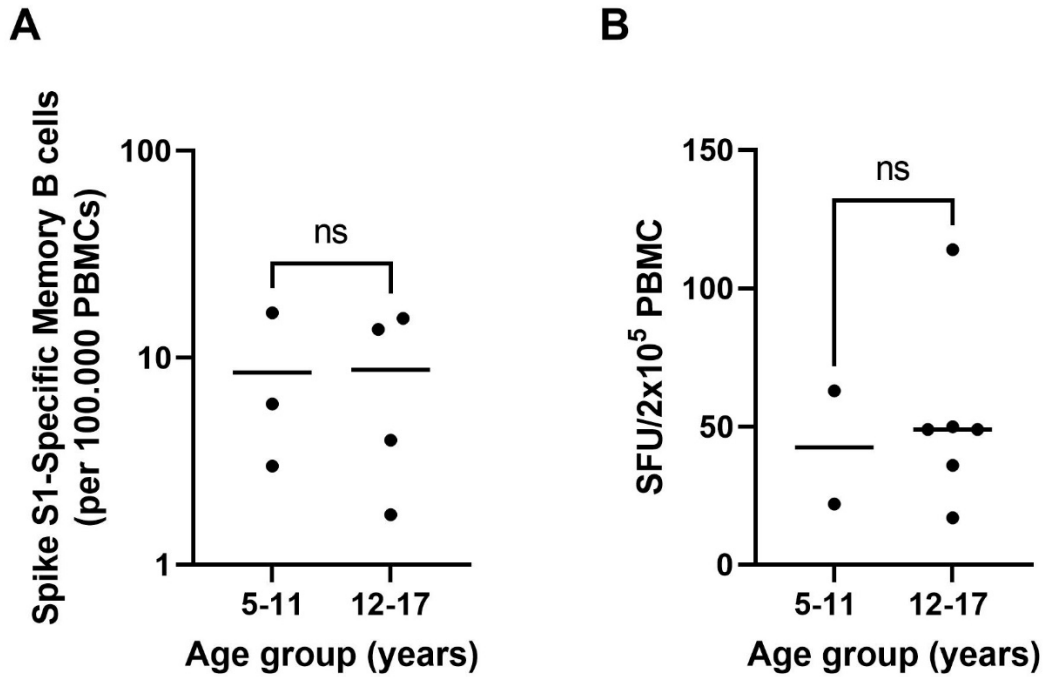

**Figure S1. No differences in cellular response are detected between age groups.**

Spike S1-specific Memory B cells in participants with a previous infection, split between two age groups (A). T-cell ELISpot showing response to Spike peptides among PBMC from previously infected children 28 days after receiving two shots of COVID-19 vaccine, split between two age groups (B). The horizontal lines indicate the medians. For plotting purposes, zeros in the Memory B-cell ELISpot assay were assigned to 0.1. Differences between unpaired groups were investigated with a Mann Whitney U test. ns = not significant.

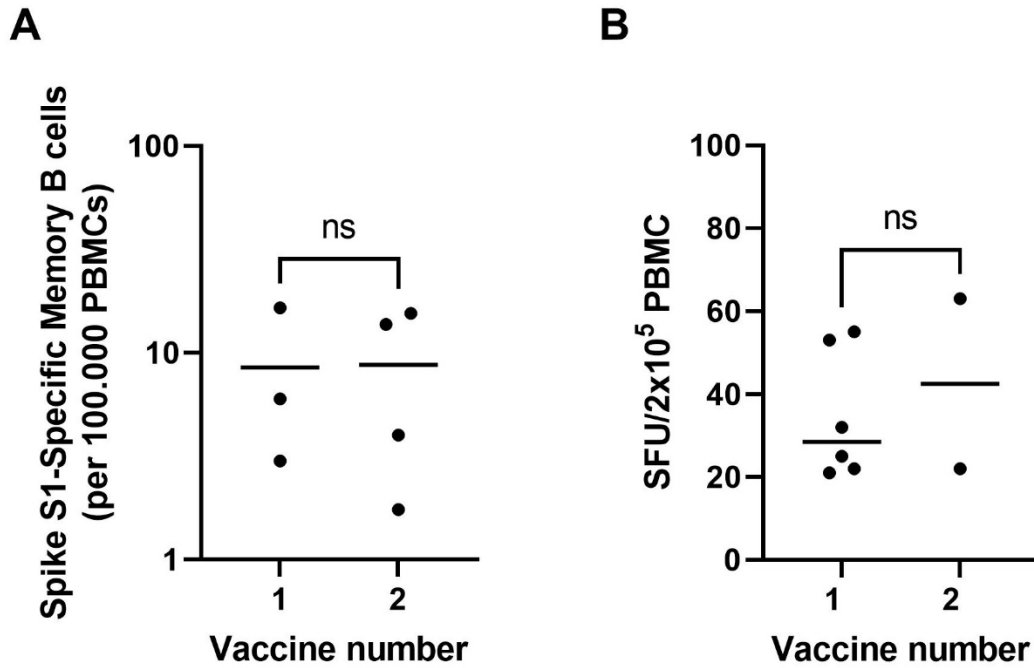

**Figure S2. Two immunizations after SARS-CoV-2 infection does not result in higher cellular responses.** Spike S1-specific Memory B cells from previously infected children comparing 1 and 2 vaccine doses (A). T-cell ELISpot response to Spike peptides among PBMC from previously infected children (age group 5-11 years) comparing one and two vaccine doses (B). The horizontal line indicates the median. Differences between unpaired groups were investigated with a Mann Whitney U test. ns = not significant

Supplementary FIGURE S2

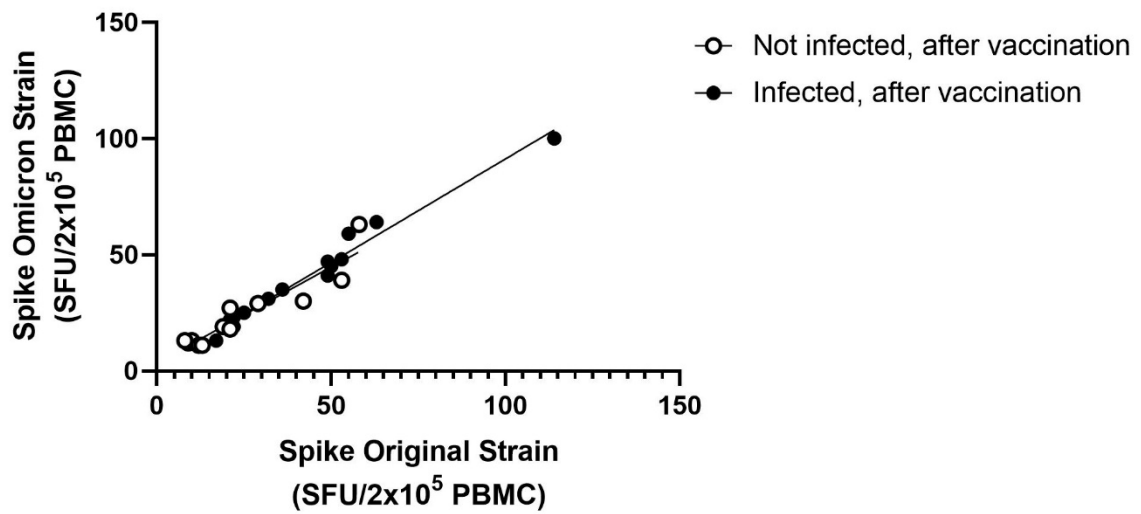

|           |              |          |
|-----------|--------------|----------|
|           | Not infected | Infected |
| R squared | 0.8671       | 0.9753   |
|           | Not infected | Infected |
| P value   | <0.0001      | <0.0001  |

**Figure S3. Correlation of T-cell ELIspot response to Spike of Original Strain and Omicron variant of concern.** Linear regression analysis of IFN- $\gamma$ -producing cells among PBMC cultured in the presence of overlapping peptides of the Spike protein from SARS-CoV-2 Original Strain and Omicron variant of concern B1629. Data are expressed as spot forming units (SFU) in PBMC samples of vaccinated children after vaccination.

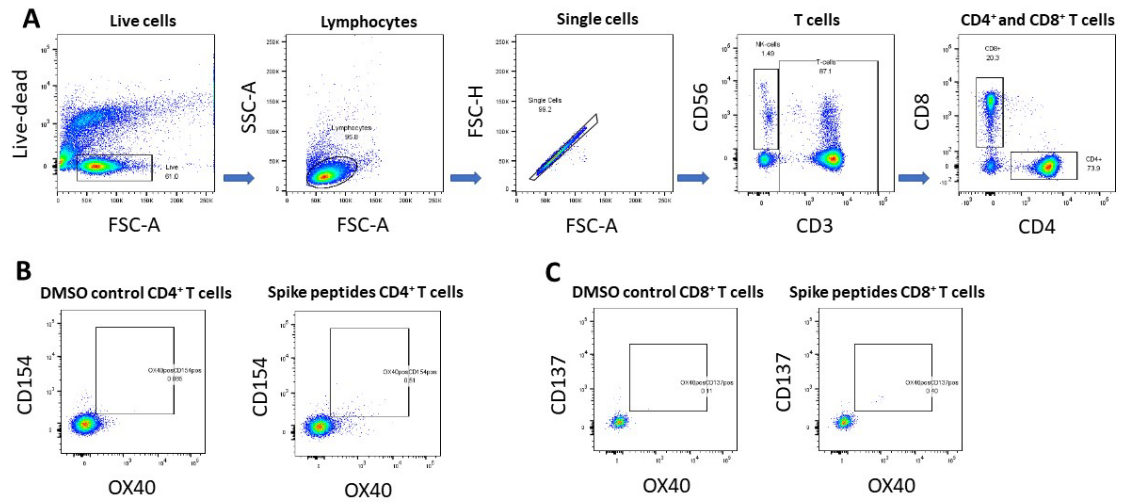

**Figure S4. Flow cytometry gating.** Definition of CD4<sup>+</sup> T cells and CD8<sup>+</sup> T cells among cultured PBMC analyzed by flow cytometry (A). Gating of OX40<sup>+</sup>CD154<sup>+</sup> among the CD4<sup>+</sup> T cell subset (B) or OX40<sup>+</sup>CD137<sup>+</sup> cells among the CD8<sup>+</sup> T cell subset (C) after culture with SARS-CoV2-Spike peptides or DMSO of representative participants.
